# Supplementary material for: Water-soluble ZnSe/ZnS:Mn/ZnS quantum dots convert UV to visible light for improved Si solar cell efficiency
Source: Royal Society of Chemistry journal article supplement (doi:10.1039/d0tc04580b), 2020-12-08
Supplement: d0tc04580b1.pdf [file d0tc04580b1.pdf]

## **Supporting Information**

### **Water-soluble ZnSe/ZnS:Mn/ZnS quantum dots convert UV to visible light for improved Si solar cell efficiency**

Hisaaki Nishimura<sup>a</sup>, Takaya Maekawa<sup>a</sup>, Kazushi Enomoto<sup>b</sup>, Naoteru Shigekawa<sup>a</sup>, Tomomi Takagi<sup>c</sup>, Susumu Sobue<sup>c</sup>, Shoichi Kawai<sup>c</sup>, and DaeGwi Kim<sup>\*a</sup>

<sup>a</sup> Department of Applied Physics, Osaka City University, Osaka 558-8585, Japan

<sup>b</sup> RIKEN Center for Emergent Matter Science (CEMS), Saitama 351-0198, Japan

<sup>c</sup> Advanced Research and Innovation Center, DENSO CORPORATION, 500-1 Minamiyama, Komenoki-cho, Nisshin, Aichi 470-0111, Japan

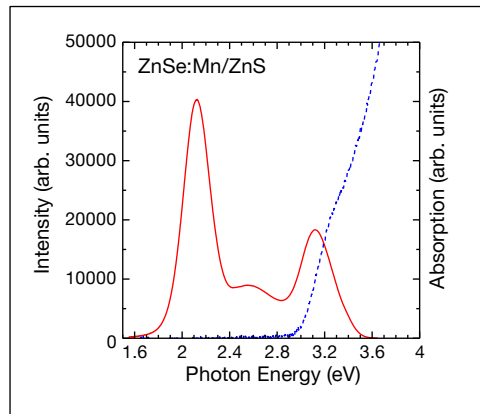

Figure S1. Optical properties of ZnSe:Mn/ZnS core/shell QDs. Absorption (dashed line) and PL spectra (solid line) of ZnSe:Mn/ZnS core/shell QDs.

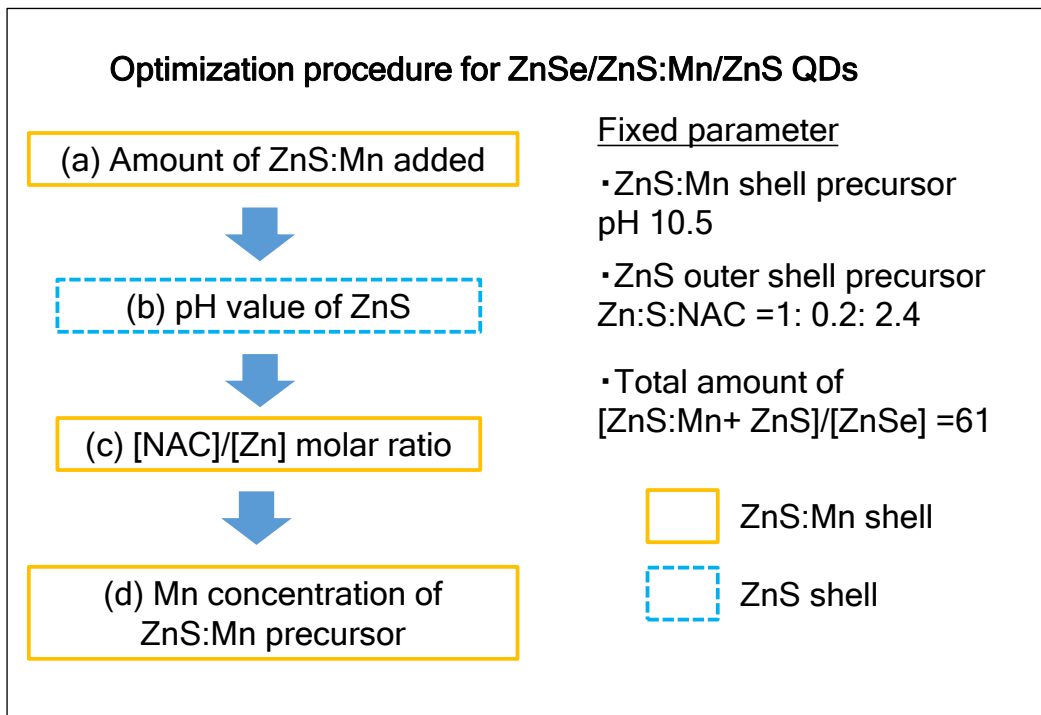

Figure S2. Flowchart for optimising the synthesis of ZnSe/ZnS:Mn/ZnS core/shell/shell QDs.

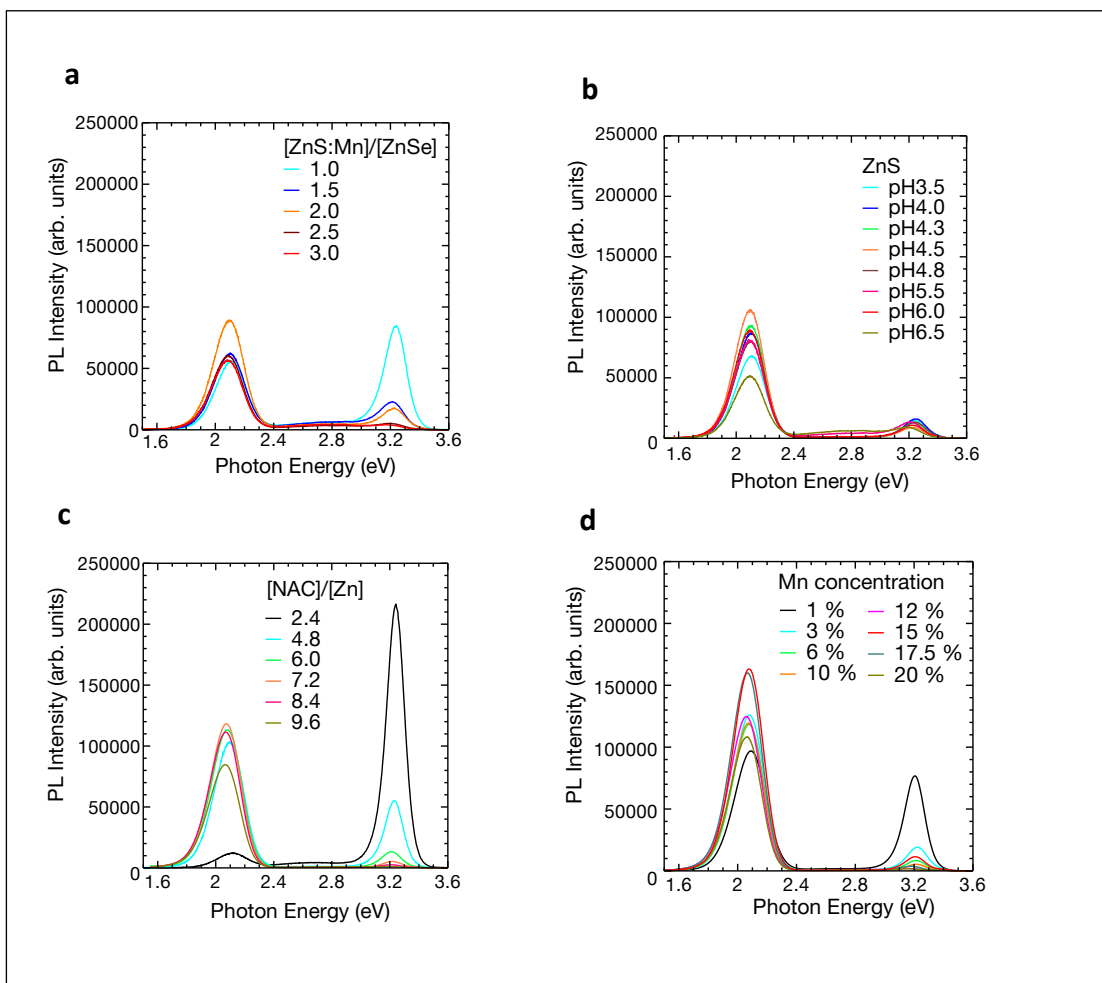

Figure S3. PL spectra of ZnSe/ZnS:Mn/ZnS core/shell/shell QDs prepared under various conditions. (a) Dependence on the [ZnS:Mn]/[ZnSe] ratio. (b) Dependence on the pH of the ZnS precursor. (c) Dependence on the [NAC]/[Zn] molar ratio of the ZnS precursor. (d) Dependence on the Mn concentration of the ZnS:Mn precursor.

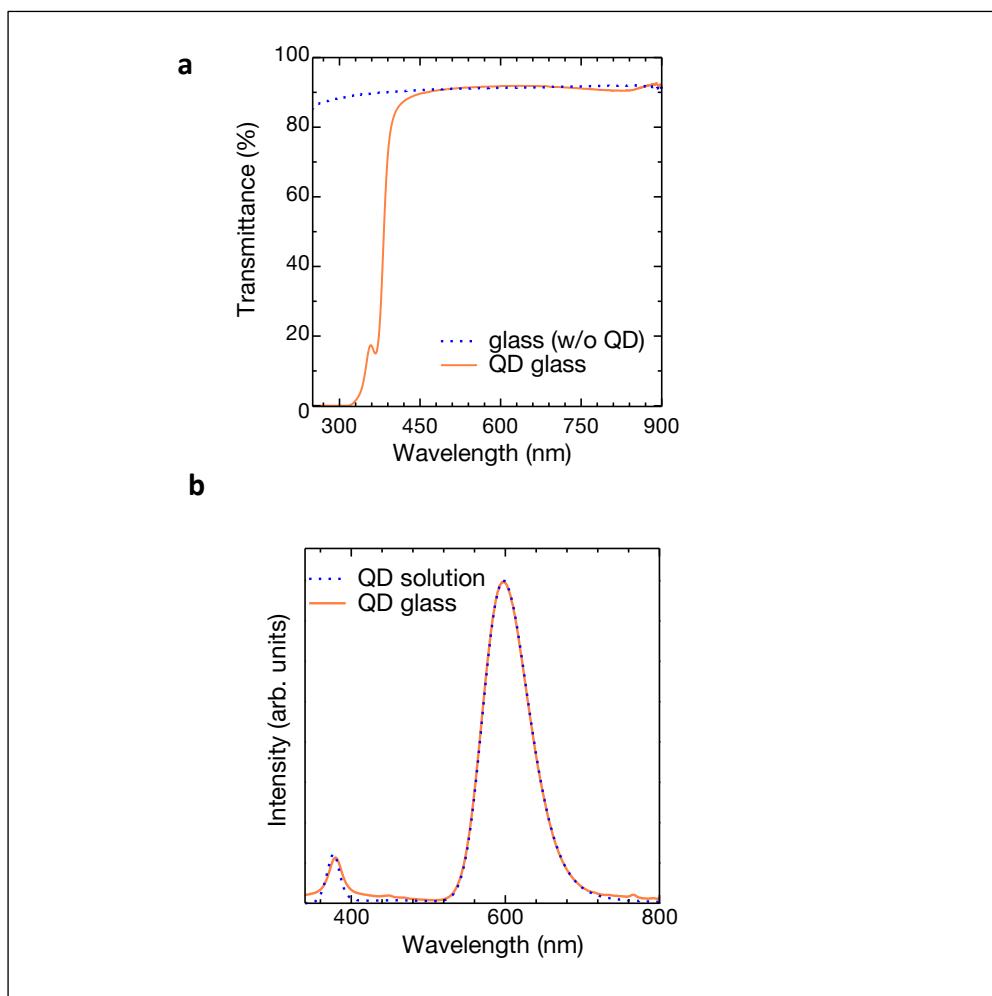

Figure S4. Optical wavelength-conversion glass (QD glass) measurements. (a) Transmittance spectra of sol-gel glass without the ZnSe/ZnS:Mn/ZnS core/shell/shell QD solution (dotted line) and with the QD glass (solid line). (b) PL spectra of the ZnSe/ZnS:Mn/ZnS core/shell/shell QD solution (dotted line) and the QD glass (solid line) (excited at 325 nm).

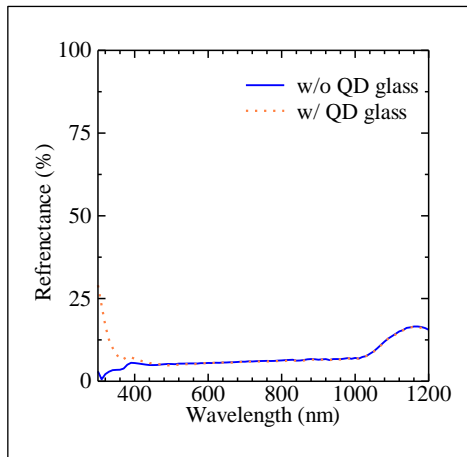

Figure S5. Surface reflectance of Si solar cells with and without the QD glass.

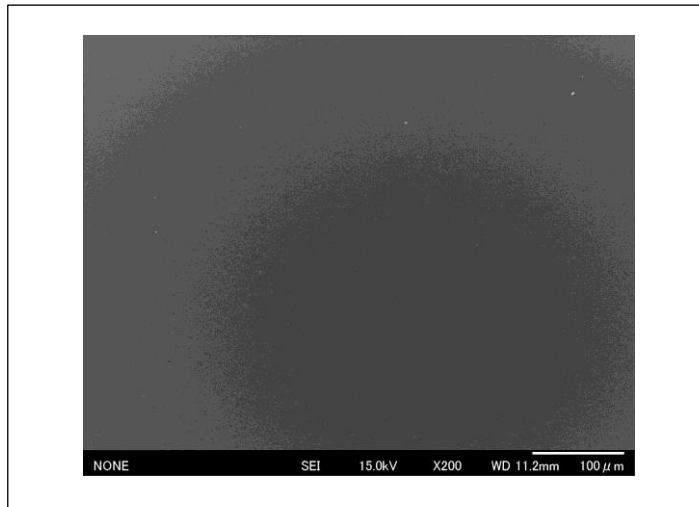

Figure S6. SEM image of the solar cell with the QD glass.
